# Supplementary material for: Novel superhard semiconducting structures of C8B2N2 predicted using the first-principles approach
Source: Royal Society of Chemistry journal article supplement (doi:10.1039/d3cp04294d), 2024-01-01
Supplement: d3cp04294d1.pdf [file d3cp04294d1.pdf]

## Supplementary information

# Novel superhard semiconducting structures of $C_8B_2N_2$ predicted using the first-principles approach

Xiao-Wei Sun<sup>a,b,\*</sup>, Meng-Ru Chen<sup>a</sup>, Ting Song<sup>b</sup>,

Jun-Hong Tian<sup>b</sup>, Zi-Jiang Liu<sup>b</sup>, Wen-Chao Huang<sup>b</sup>

<sup>a</sup>School of Mechanical Engineering, Lanzhou Jiaotong University, Lanzhou 730070, China

<sup>b</sup>School of Mathematics and Physics, Lanzhou Jiaotong University, Lanzhou 730070, China

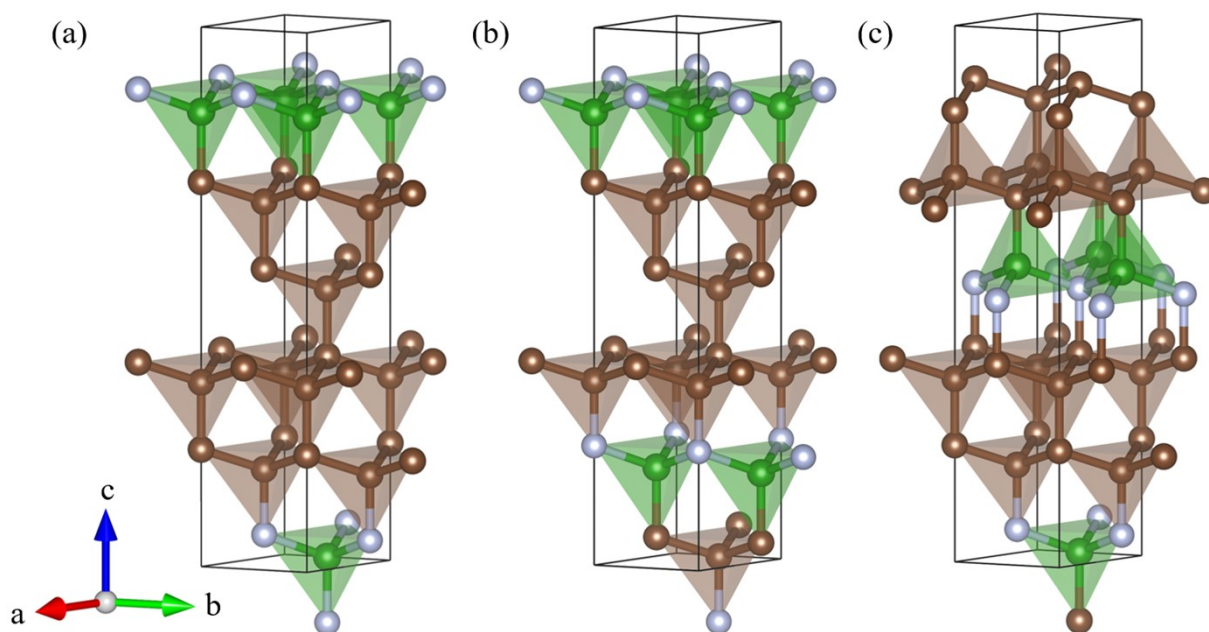

Fig. S1 Polyhedral view of the (a)  $a$ - $C_8B_2N_2$ , (b)  $b$ - $C_8B_2N_2$  and (c)  $c$ - $C_8B_2N_2$

\*Corresponding author.

E-mail address: [sunxw\\_lzjtu@yeah.net](mailto:sunxw_lzjtu@yeah.net) (X. -W. Sun)

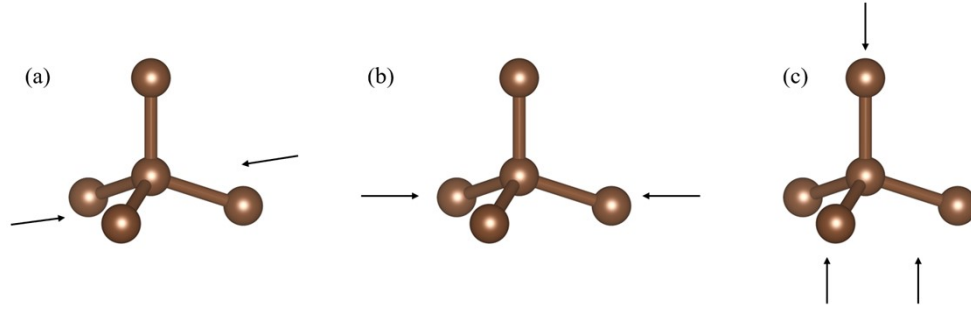

**Fig. S2** Schematic diagram of a C5 tetrahedra under compression along the (a) *a*-, (b) *b*- and (c) *c*-axes, respectively

**Table S1** The optimized lattice constants (Å) and atomic coordinates of the BCN and  $x$ -C<sub>8</sub>B<sub>2</sub>N<sub>2</sub> ( $x = a, b, c$ )

|                                                        | Space group | Lattice constants |          | Atomic coordinates                  |
|--------------------------------------------------------|-------------|-------------------|----------|-------------------------------------|
|                                                        |             | <i>a</i>          | <i>c</i> |                                     |
| BCN                                                    | <i>P3m1</i> | 2.546             | 6.293    | C1 1 <i>b</i> (0.333, 0.667, 0.015) |
|                                                        |             | 2.550             | 6.301    | C2 1 <i>c</i> (0.667, 0.333, 0.093) |
| <i>a</i> -C <sub>8</sub> B <sub>2</sub> N <sub>2</sub> | <i>P3m1</i> | 2.536             | 12.456   | B1 1 <i>c</i> (0.667, 0.333, 0.353) |
|                                                        |             |                   |          | B2 1 <i>a</i> (0, 0, 0.685)         |
|                                                        |             |                   |          | N1 1 <i>b</i> (0.333, 0.667, 0.770) |
|                                                        |             |                   |          | N2 1 <i>a</i> (0, 0, 0.440)         |
|                                                        |             |                   |          | C1 1 <i>c</i> (0.667, 0.333, 0.176) |
|                                                        |             |                   |          | C2 1 <i>c</i> (0.667, 0.333, 0.672) |
|                                                        |             |                   |          | C3 1 <i>c</i> (0.667, 0.333, 0.548) |
|                                                        |             |                   |          | C4 1 <i>a</i> (0, 0, 0.342)         |
|                                                        |             |                   |          | C5 1 <i>a</i> (0, 0, 0.217)         |
|                                                        |             |                   |          | C6 1 <i>a</i> (0, 0, 0.713)         |
| <i>b</i> -C <sub>8</sub> B <sub>2</sub> N <sub>2</sub> | <i>P3m1</i> | 2.534             | 12.511   | C7 1 <i>b</i> (0.333, 0.667, 0.507) |
|                                                        |             |                   |          | C8 1 <i>b</i> (0.333, 0.667, 0.383) |
|                                                        |             |                   |          | B1 1 <i>a</i> (0, 0, 0.843)         |
|                                                        |             |                   |          | B2 1 <i>b</i> (0.333, 0.667, 0.010) |
|                                                        |             |                   |          | N1 1 <i>c</i> (0.667, 0.333, 0.055) |
|                                                        |             |                   |          | N2 1 <i>b</i> (0.333, 0.667, 0.889) |
|                                                        |             |                   |          | C1 1 <i>c</i> (0.667, 0.333, 0.048) |
|                                                        |             |                   |          | C2 1 <i>c</i> (0.667, 0.333, 0.672) |
|                                                        |             |                   |          | C3 1 <i>c</i> (0.667, 0.333, 0.549) |
|                                                        |             |                   |          | C4 1 <i>a</i> (0, 0, 0.343)         |
| C5 1 <i>a</i> (0, 0, 0.713)                            |             |                   |          |                                     |
| C6 1 <i>b</i> (0.333, 0.667, 0.008)                    |             |                   |          |                                     |
| C7 1 <i>b</i> (0.333, 0.667, 0.384)                    |             |                   |          |                                     |
| C8 1 <i>b</i> (0.333, 0.667, 0.508)                    |             |                   |          |                                     |
| B1 1 <i>c</i> (0.667, 0.333, 0.178)                    |             |                   |          |                                     |
| B2 1 <i>a</i> (0, 0, 0.843)                            |             |                   |          |                                     |
| N1 1 <i>a</i> (0, 0, 0.222)                            |             |                   |          |                                     |
| N2 1 <i>b</i> (0.333, 0.667, 0.887)                    |             |                   |          |                                     |

---

|                                    |        |       |        |                               |
|------------------------------------|--------|-------|--------|-------------------------------|
| $c\text{-C}_8\text{B}_2\text{N}_2$ | $P3m1$ | 2.537 | 12.496 | C1 $1c$ (0.667, 0.333, 0.177) |
|                                    |        |       |        | C2 $1c$ (0.667, 0.333, 0.677) |
|                                    |        |       |        | C3 $1a$ (0, 0, 0.341)         |
|                                    |        |       |        | C4 $1a$ (0, 0, 0.218)         |
|                                    |        |       |        | C5 $1a$ (0, 0, 0.841)         |
|                                    |        |       |        | C6 $1a$ (0, 0, 0.718)         |
|                                    |        |       |        | C7 $1b$ (0.333, 0.667, 0.383) |
|                                    |        |       |        | C8 $1b$ (0.333, 0.667, 0.883) |
|                                    |        |       |        | B1 $1c$ (0.667, 0.333, 0.548) |
|                                    |        |       |        | B2 $1b$ (0.333, 0.667, 0.011) |
|                                    |        |       |        | N1 $1c$ (0.667, 0.333, 0.057) |
|                                    |        |       |        | N2 $1b$ (0.333, 0.667, 0.502) |

---
